# Supplementary material for: Cis regulatory motifs and antisense transcriptional control in the apicomplexan Theileria parva
Source: PubMed Central journal article supplement (PMC4761415; doi:10.1186/s12864-016-2444-5), 2016-02-20
Supplement: 12864_2016_2444_MOESM1_ESM.pdf [file 12864_2016_2444_MOESM1_ESM.pdf]

# Additional File 1. Supplemental Figures.

Tretina, Pelle and Silva.

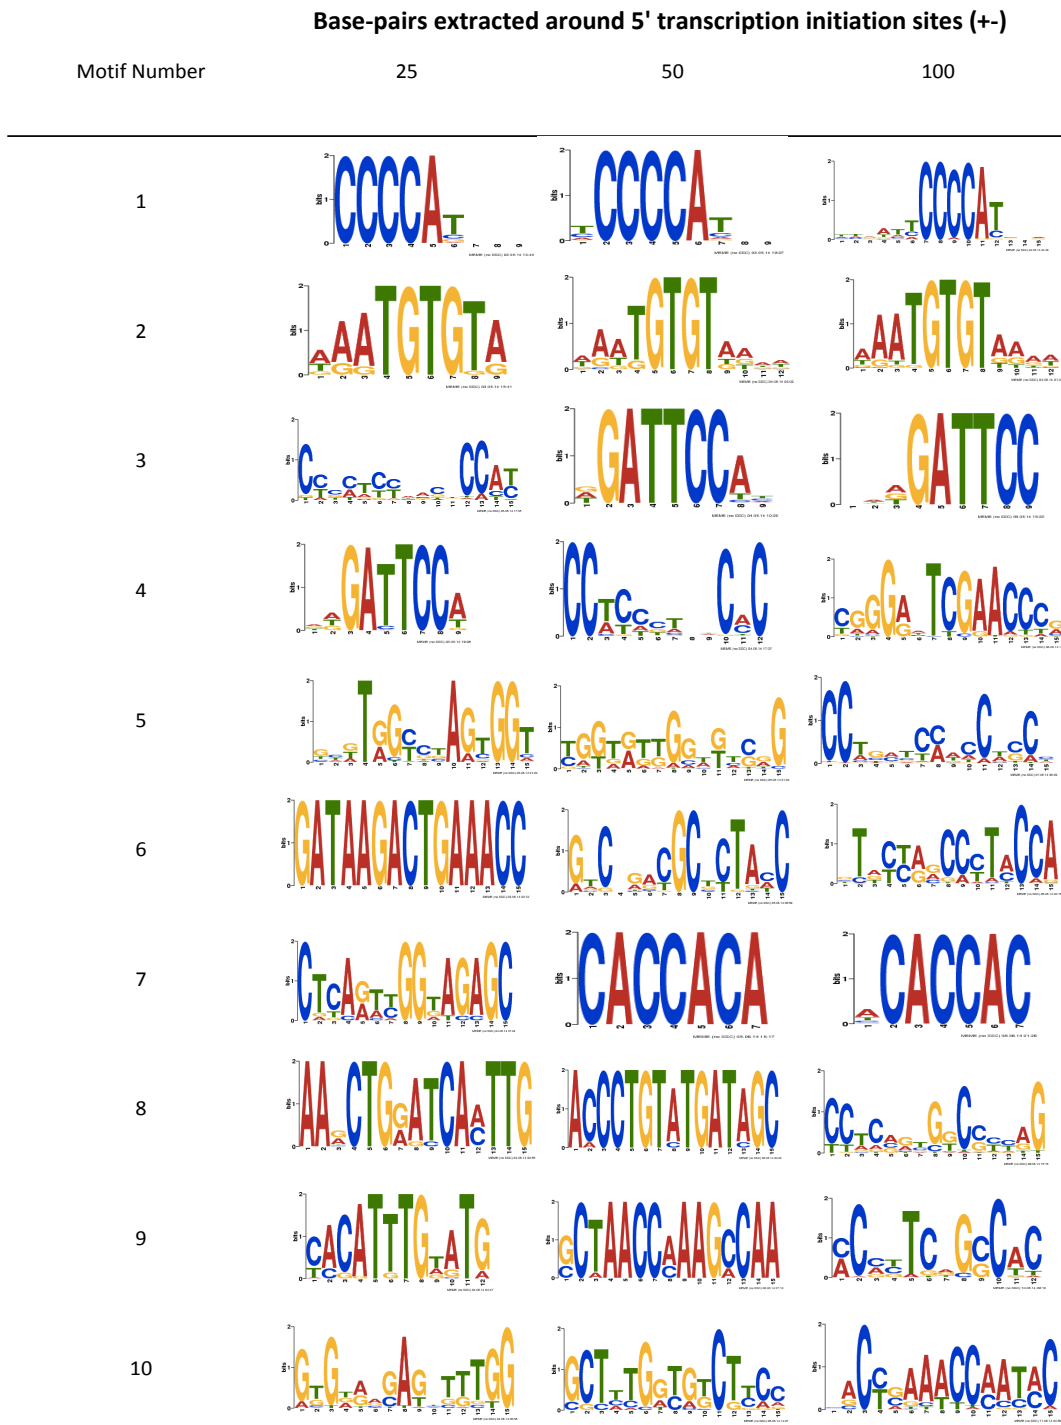

**Supplemental Figure 1a.** All motifs discovered around transcription initiation sites, at varying distances, and their frequency distributions.

Bp searched  
around TSS

25

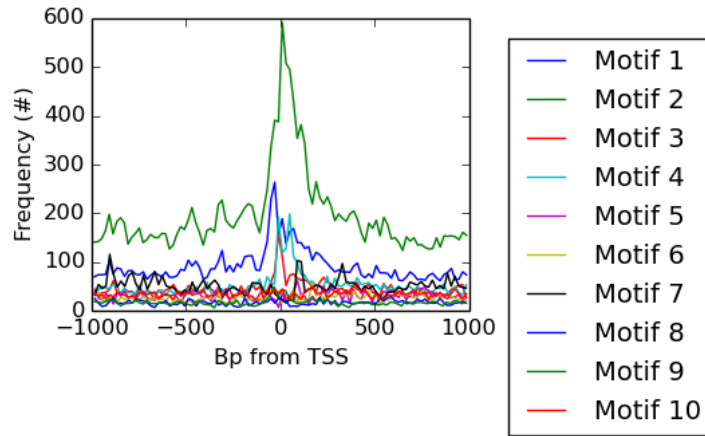

50

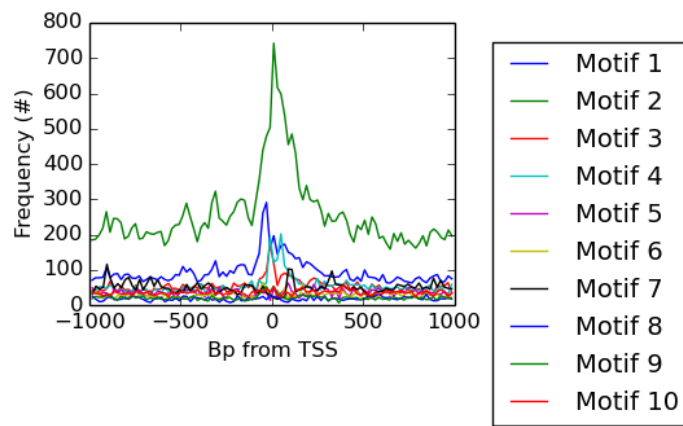

100

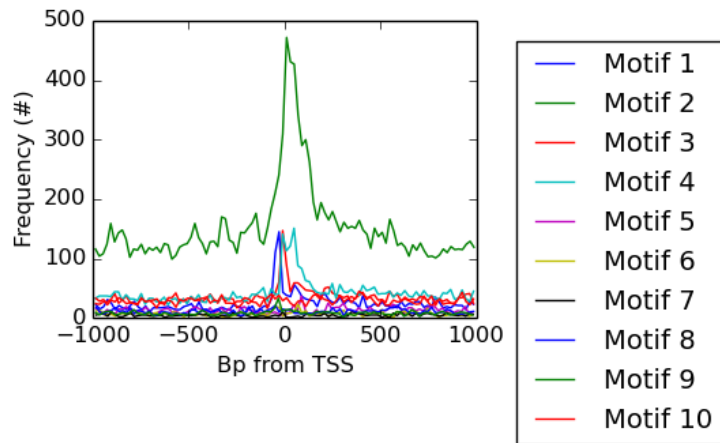

**Supplemental Figure 1b.** All motifs discovered around transcription start sites, at varying distances, and their frequency distributions.

Base-pairs extracted around 3' transcription termination sites (+-)

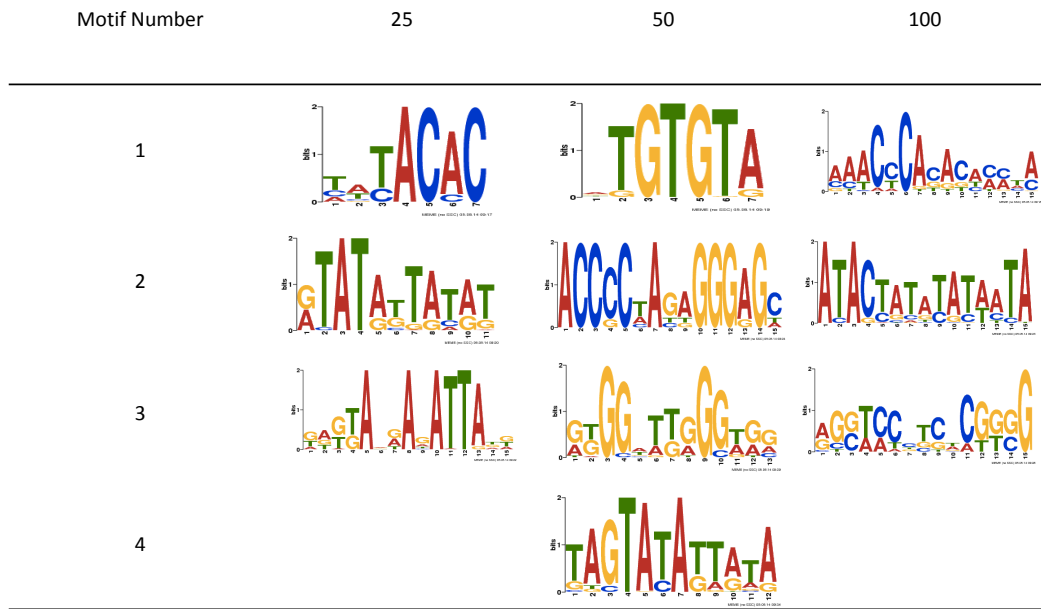

**Supplemental Figure 2a.** All motifs discovered around transcription termination sites at varying distances, and their distributions.

Bp searched  
around TTS

50

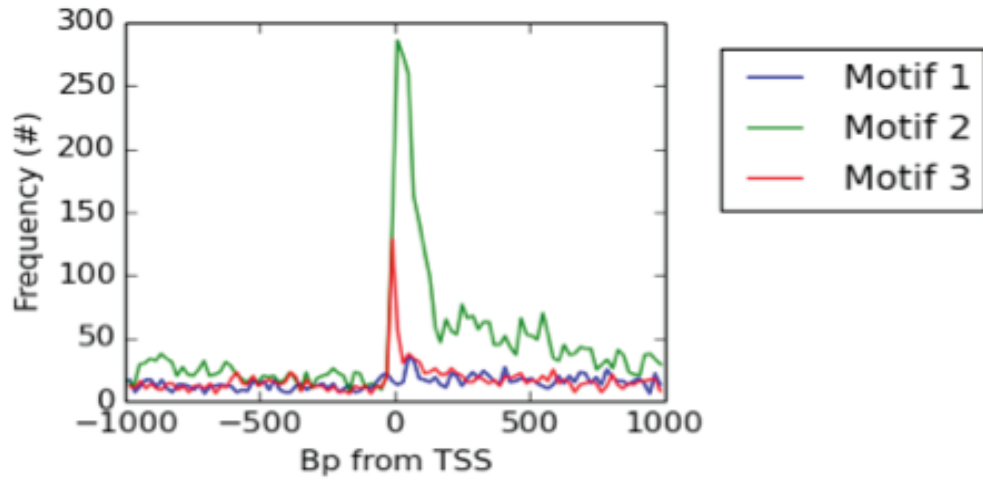

100

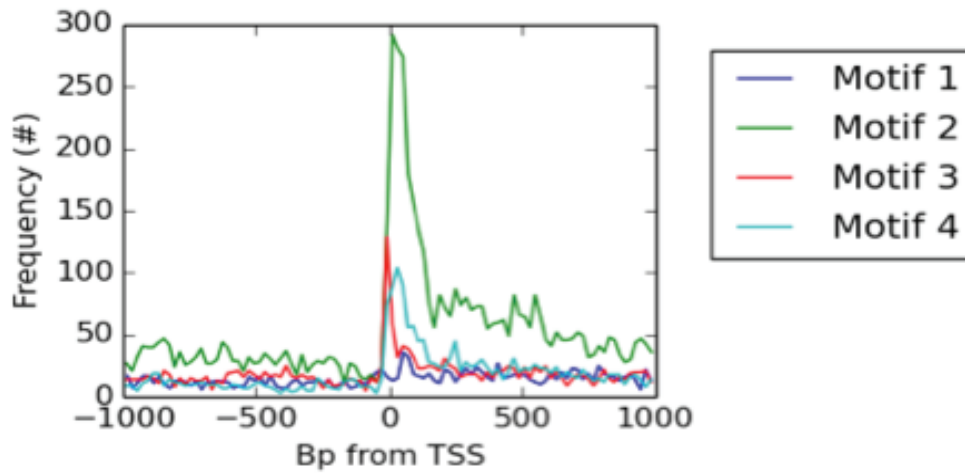

200

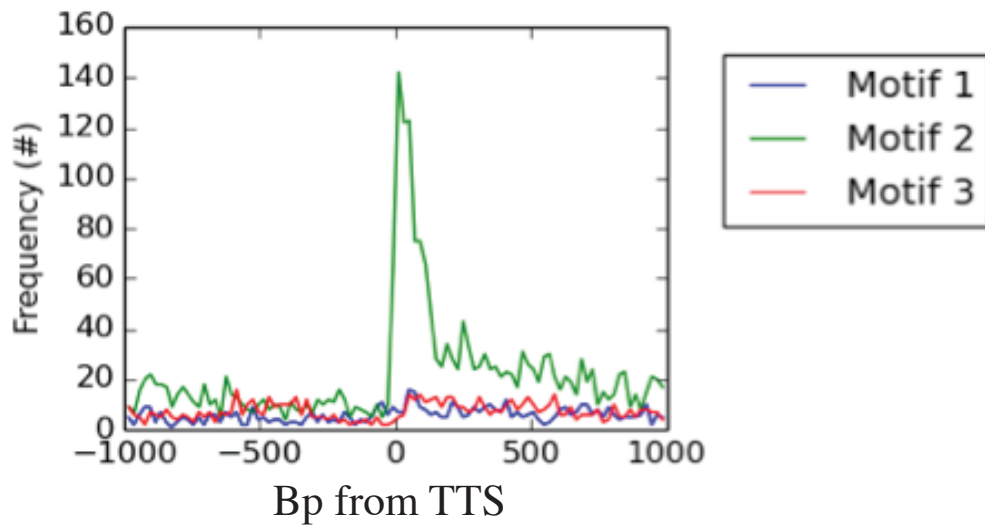

**Supplemental Figure 2b.** All motifs discovered around transcription termination sites at varying distances, and their distributions.

**Motif**





| Structure Name | Image                                                                             | $\Delta G(\text{kcal.mole}^{-1})$ | $T_m$ ( $^{\circ}\text{C}$ ) | $\Delta H(\text{kcal.mole}^{-1})$ | $\Delta S(\text{cal.K}^{-1}\text{mole}^{-1})$ |
|----------------|-----------------------------------------------------------------------------------|-----------------------------------|------------------------------|-----------------------------------|-----------------------------------------------|
| 1              |  | -2.99                             | 62.5                         | -26.8                             | -79.85                                        |
| 2              |  | -2.64                             | 55.4                         | -28.5                             | -86.75                                        |

| Structure Name | Image                                                                             | $\Delta G(\text{kcal.mole}^{-1})$ | $T_m$ ( $^{\circ}\text{C}$ ) | $\Delta H(\text{kcal.mole}^{-1})$ | $\Delta S(\text{cal.K}^{-1}\text{mole}^{-1})$ |
|----------------|-----------------------------------------------------------------------------------|-----------------------------------|------------------------------|-----------------------------------|-----------------------------------------------|
| 1              |  | 1.84                              | -68.8                        | -4                                | -19.58                                        |
| 2              |  | 2.71                              | -273.1                       | 0                                 | -9.09                                         |

| Structure Name | Image                                                                             | $\Delta G(\text{kcal.mole}^{-1})$ | $T_m$ ( $^{\circ}\text{C}$ ) | $\Delta H(\text{kcal.mole}^{-1})$ | $\Delta S(\text{cal.K}^{-1}\text{mole}^{-1})$ |
|----------------|-----------------------------------------------------------------------------------|-----------------------------------|------------------------------|-----------------------------------|-----------------------------------------------|
| 1              |  | 1.25                              | -7                           | -10.4                             | -39.08                                        |
| 2              |  | 1.52                              | -54.3                        | -4.2                              | -19.19                                        |
| 3              |  | 1.73                              | -17.4                        | -10.4                             | -40.67                                        |
| 4              |  | 1.85                              | -21.6                        | -10                               | -39.76                                        |
| 5              |  | 2.11                              | -55.5                        | -5.7                              | -26.18                                        |
| 6              |  | 2.12                              | -81.9                        | -3.8                              | -19.87                                        |

**Supplemental Figure 2c.** Each motif from the MEME search using  $\pm 50\text{bp}$  sequences around the transcription termination site, and the consensus sequence submitted to Integrated DNA Technology's OligoAnalyzer 3.1 (<https://www.idtdna.com/calc/analyzer>) and the output displayed above.

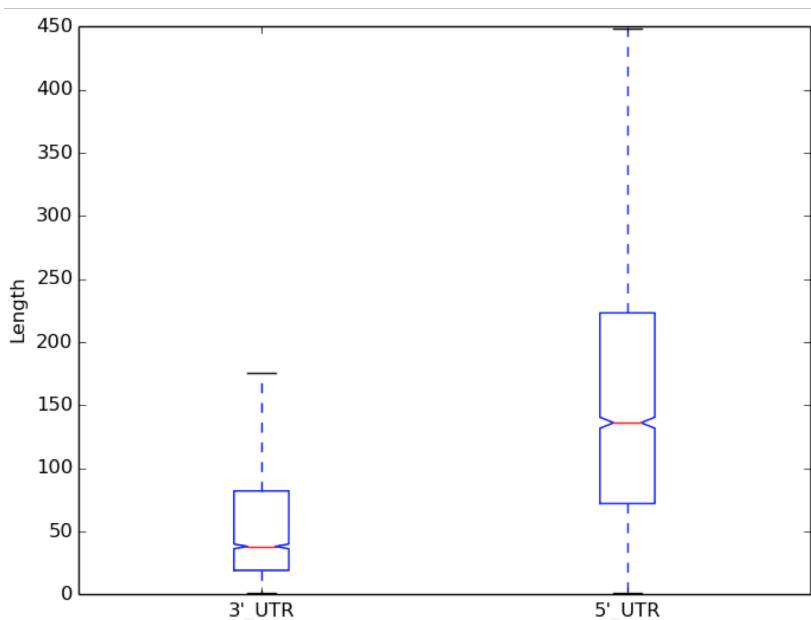

**Supplemental Figure 3.** Length of annotated 3' and 5' untranslated regions (UTRs) in *T. parva*. Box and whisker plots showing that 5' UTRs are significantly longer than 3' UTRs. Outliers are not shown, to simplify the visual display.

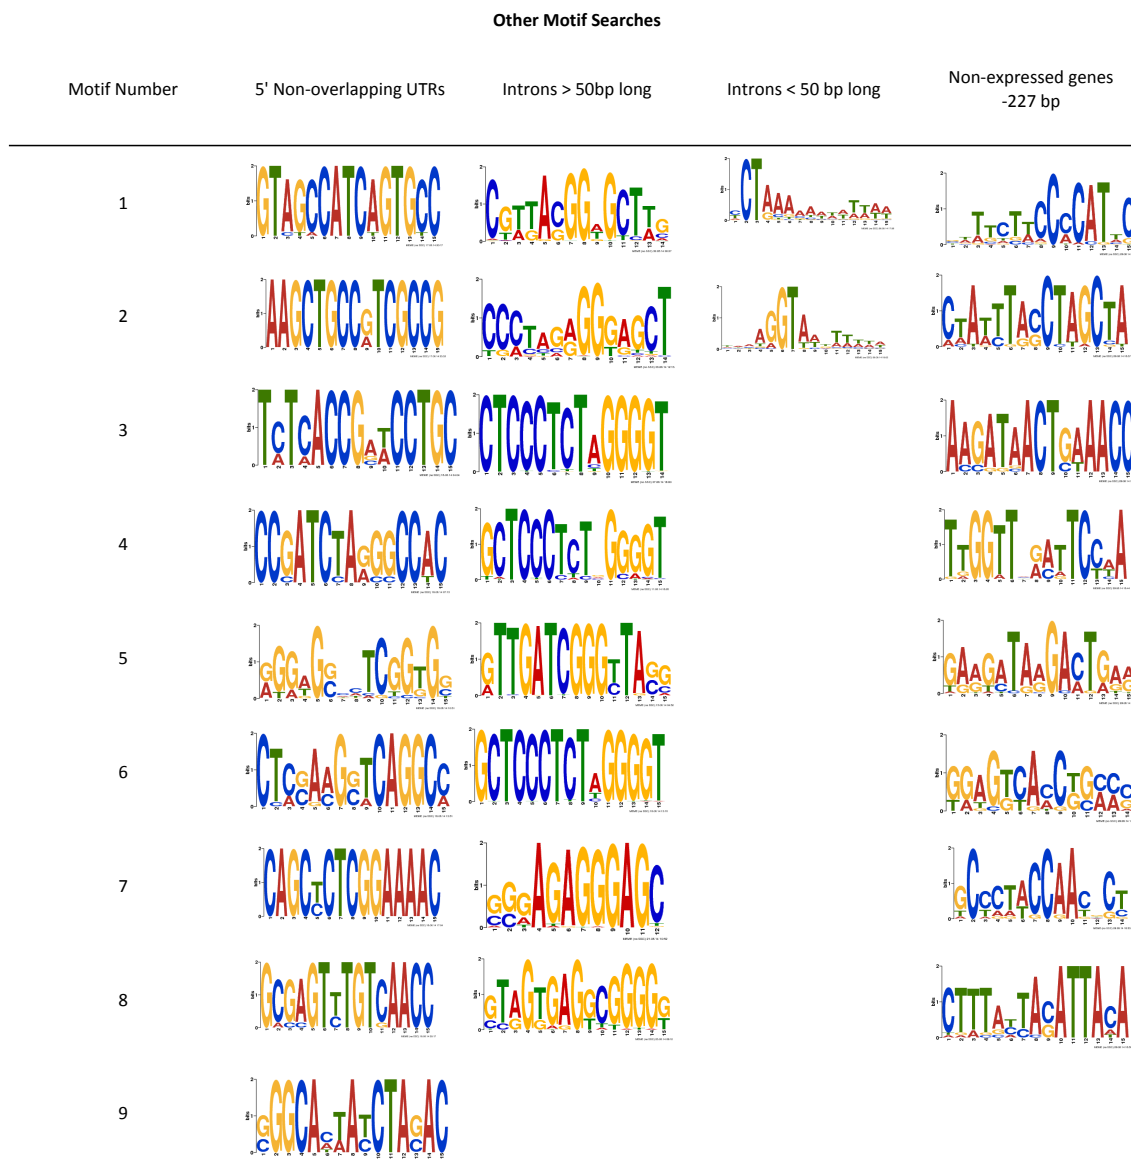

**Supplemental Figure 4a.** Other MEME motif searches found novel motifs. Regions that were searched include all 5' untranslated regions that did not overlap any adjacent gene, introns longer than 50bp long, introns less than 50bp long, and non-expressed genes (FPKM < 1).

| <b>Region</b>  | <b>Consensus Motif</b> | <b>Region</b>                | <b>Consensus Motif</b> |
|----------------|------------------------|------------------------------|------------------------|
| 25bp TSS       | CCCCATNNN              | 25bp TTS                     | TATACAC                |
|                | AAATGTGTA              |                              | GTATATTATAT            |
|                | CCCCTCCAACNCCAT        |                              | GAGTANGAGATTA          |
|                | AAGATTCCA              | 50BP TTS                     | ATGTGTA                |
|                | GTGTGGCCTAGTGGT        |                              | ACCCCTAGAGGGGAGC       |
|                | GATAAGACTGAAACC        |                              | GTGGATTGGGTGG          |
|                | CTCAGTTGGTAGAGC        |                              | TAGTATATTATA           |
|                | AAGCTGGATCAATTG        | 100bp TTS                    | AAACCCACACACCTA        |
|                | CACATTTGTATG           |                              | ATACTATATATAATA        |
| GTGTAAGAGATTGG | AGGTCCCTCTCGGGG        |                              |                        |
| 50bp TSS       | TCCCCATNN              | 5' Non-overlapping UTRs      | GTAGCCATCAGTGCC        |
|                | AAATGTGTAATA           |                              | AAGCTGCCGTCGCCG        |
|                | CGATTCCAT              |                              | TCTACCCGATCCTGC        |
|                | CCTCCCTNNCAC           |                              | CCGATCTAGGGCCAC        |
|                | TGGTGTGGTGTCGG         |                              | GGGAGGCCTCGGTGG        |
|                | GTCNGACGCTCTACCCACCACA |                              | CTCGAAGGTCAGGCC        |
|                | ACCCTGTATGATAGC        |                              | CAGCTGTCGGAAAAC        |
|                | GCTAACCAAAGCCAA        |                              | GCGAGTTTGTCAACC        |
|                | GCTTTGGTGTCTTCC        |                              | GGGCACTATCTAGAC        |
| 100bp TSS      | TTCATTCCCCATCNA        | Introns > 50bp long          | CGTTACGGAGCTTG         |
|                | AAATGTGTAATA           |                              | CCCTAGAGGGGAGCT        |
|                | NAAGATTCC              |                              | CTCCCTCTAGGGGT         |
|                | CGGGAATCGAACCCG        |                              | GCTCCCTCTGGGGGT        |
|                | CCTGATCCACCTCCC        |                              | GTTGATCGGGTTAGG        |
|                | GTA TAGCCCTACCA        |                              | GCTCCCTCTAGGGGT        |
|                | ACACCAC                |                              | GGGAGAGGGGAGC          |
|                | CCTCAGTGGCCCCAG        |                              | GTAGTGAGGCGGGGG        |
|                | CCCTCAGCCAC            |                              | Introns < 50bp long    |
|                | NACCGAAACCAATAC        | TAAAGGTAATTTTAA              |                        |
|                |                        | Non-expressed genes (-227bp) | GTTCTTCCCCATTC         |
|                |                        |                              | CTATTTACCTAGCTA        |
|                |                        |                              | AAGATAACTGAAACC        |
|                |                        |                              | TTGGTTNGATTCCAA        |
|                |                        |                              | GAAGATAAGACTGAA        |
|                |                        |                              | GGAGTCACCTGCCC         |
|                |                        |                              | GCCCTACCAACNCT         |
|                |                        | CTTTATTACATTACA              |                        |

**Supplemental Figure 4b.** This table summarizes all motifs found in the present study.
