# Supplementary material for: Cis regulatory motifs and antisense transcriptional control in the apicomplexan Theileria parva
Source: PubMed Central journal article supplement (PMC4761415; doi:10.1186/s12864-016-2444-5), 2016-02-20
Supplement: 12864_2016_2444_MOESM2_ESM.pdf [file 12864_2016_2444_MOESM2_ESM.pdf]

**Supplemental Table 1.** Statistical enrichment of motifs from Figure 3 (TSS motifs 1-3) and Figure 4 (TTS motif 4) in different kinds of intergenic regions in each *Theileria* genome. This table shows the results of two-sided Pearson's chi-square test for each comparison (red = p-value < 0.05).

| <i>Theileria parva</i> |              | Comparisons  |              |
|------------------------|--------------|--------------|--------------|
| Motif                  | 5'5' vs 5'3' | 5'3' vs 3'3' | 5'5' vs 3'3' |
| TSS 1                  | 8.73E-01     | 4.93E-12     | 3.94E-10     |
| TSS 2                  | 7.80E-02     | 8.27E-06     | 8.57E-08     |
| TSS 3                  | 0.41515994   | 7.99E-01     | 7.39E-01     |
| TTS 4                  | 1.20E-03     | 5.32E-17     | 1.40E-21     |

  

| <i>Theileria annulata</i> |              |              |              |
|---------------------------|--------------|--------------|--------------|
| Motif                     | 5'5' vs 5'3' | 5'3' vs 3'3' | 5'5' vs 3'3' |
| TSS 1                     | 3.87E-02     | 1.04E-17     | 2.27E-22     |
| TSS 2                     | 3.15E-18     | 1.45E-37     | 1.36E-75     |
| TSS 3                     | 1.00E+00     | 8.53E-01     | 1.00E+00     |
| TTS 4                     | 3.31E-01     | 3.39E-05     | 9.34E-03     |

  

| <i>Theileria orientalis</i> |              |              |              |
|-----------------------------|--------------|--------------|--------------|
| Motif                       | 5'5' vs 5'3' | 5'3' vs 3'3' | 5'5' vs 3'3' |
| TSS 1                       | 1.37E-01     | 8.92E-22     | 1.25E-25     |
| TSS 2                       | 9.60E-06     | 3.13E-19     | 5.98E-33     |
| TSS 3                       | 2.07E-01     | 3.56E-01     | 8.71E-01     |
| TTS 4                       | 1.61E-02     | 5.34E-01     | 1.32E-01     |

  

| <i>Theileria equi</i> |              |              |              |
|-----------------------|--------------|--------------|--------------|
| Motif                 | 5'5' vs 5'3' | 5'3' vs 3'3' | 5'5' vs 3'3' |
| TSS 1                 | 3.05E-08     | 7.46E-22     | 4.60E-38     |
| TSS 2                 | 1.25E-21     | 8.13E-39     | 1.51E-80     |
| TSS 3                 | 2.20E-09     | 2.57E-04     | 2.42E-14     |
| TTS 4                 | 7.37E-03     | 2.54E-07     | 1.86E-11     |

**Supplemental Table 2.** Hexamers that potentially act as polyadenylation signals in *T. parva*.

| Iterations | Top Hexamer |
|------------|-------------|
| 1          | AAAAUA      |
| 2          | UAAUUU      |
| 3          | AAAAUU      |
| 4          | UAAUAU      |
| 5          | UUUAAA      |

**Supplemental Table 3.** The top 10 most frequent GO terms found in the *T. parva* Muguga functional annotation

| <b>GO Term</b> | <b>Frequency</b> | <b>Name</b>                        |
|----------------|------------------|------------------------------------|
| GO:0005524     | 337              | ATP binding                        |
| GO:0005634     | 228              | nucleus                            |
| GO:0005737     | 200              | cytoplasm                          |
| GO:0016021     | 121              | integral component of membrane     |
| GO:0003677     | 110              | DNA binding                        |
| GO:0046872     | 109              | metal ion binding                  |
| GO:0003723     | 106              | <b>RNA binding</b>                 |
| GO:0005829     | 103              | cytosol                            |
| GO:0003735     | 96               | structural constituent of ribosome |
| GO:0005730     | 96               | nucleolus                          |

**Supplemental Table 4.** Motifs found upstream of gene family 1, Subtelomere-encoded Variable Secreted Protein (SVSP) family.

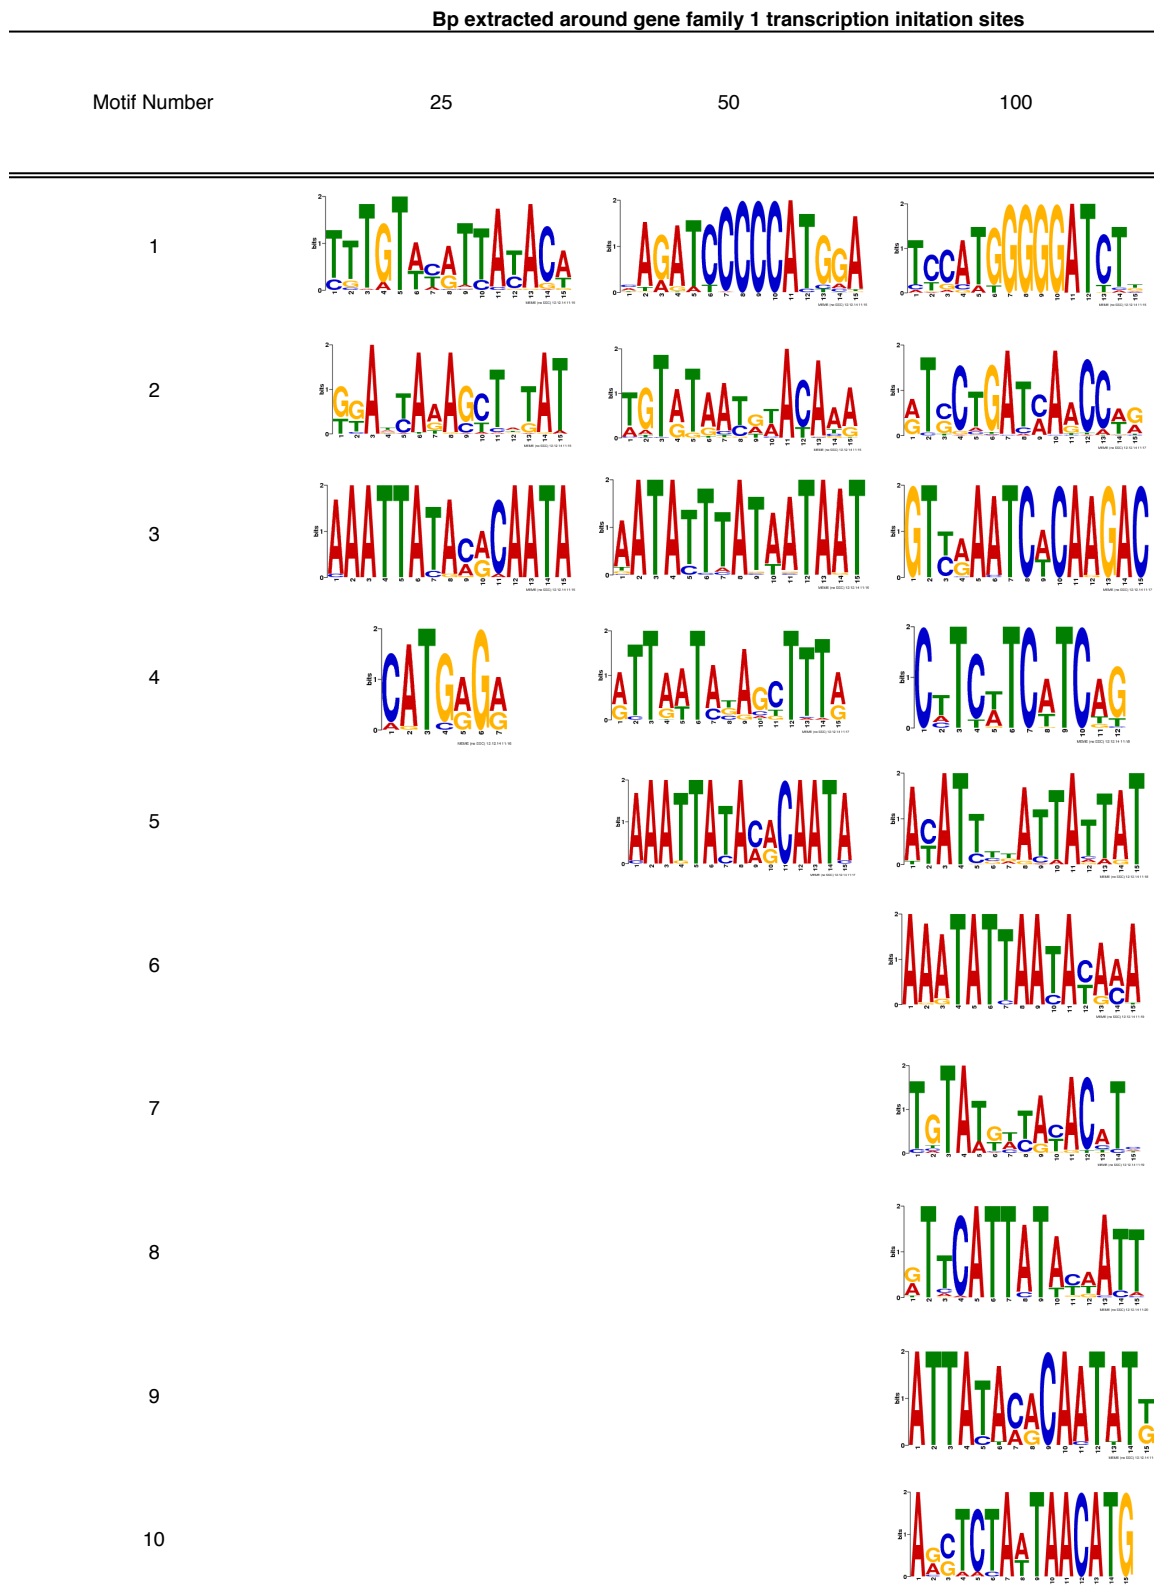

**Supplemental Table 5.** Motifs found upstream of gene family 2, Hypothetical DUF529 Gene family.

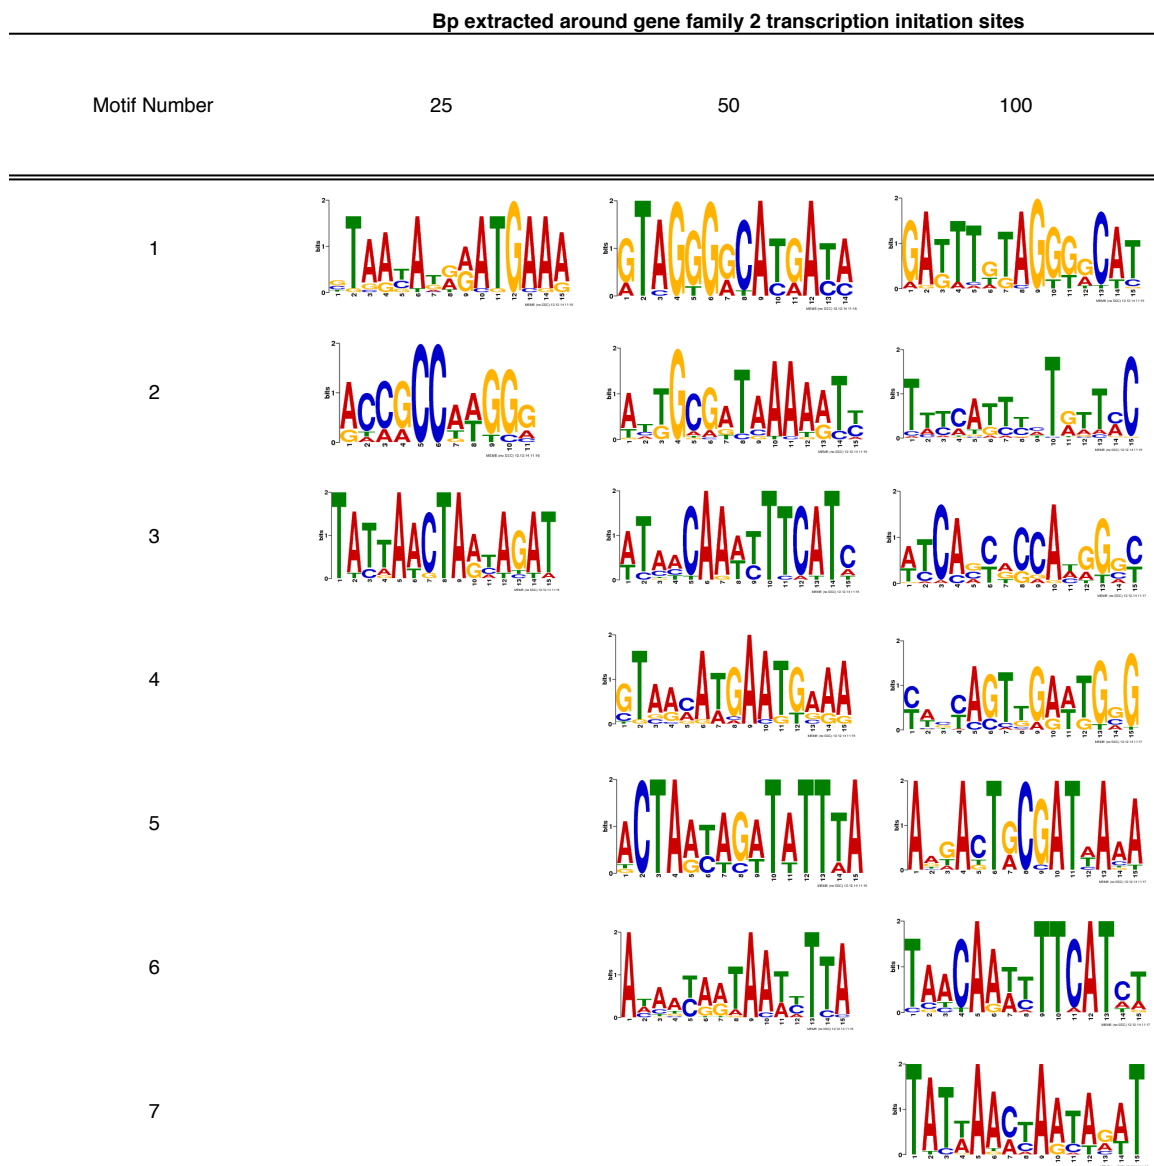

**Supplemental Table 6.** Motifs found upstream of gene family 3, Protein Tyrosine Kinase family.

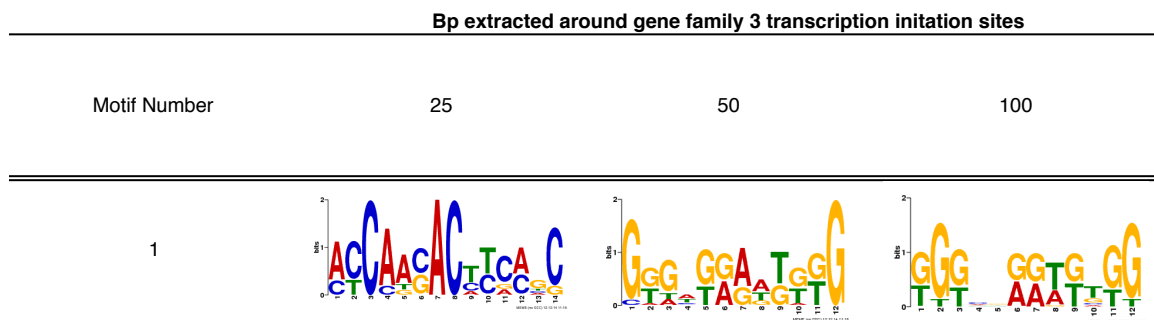

**Supplemental Table 7.** Motifs found upstream of gene family 4, *T. parva* Repeat (Tpr) family.

| Bp extracted around gene family 4 transcription initiation sites |                                                                                   |                                                                                     |     |
|------------------------------------------------------------------|-----------------------------------------------------------------------------------|-------------------------------------------------------------------------------------|-----|
| Motif Number                                                     | 25                                                                                | 50                                                                                  | 100 |
| 1                                                                |  |    |     |
| 2                                                                |  |    |     |
| 3                                                                |  |    |     |
| 4                                                                |  |    |     |
| 5                                                                |                                                                                   |   |     |
| 6                                                                |                                                                                   |  |     |
| 7                                                                |                                                                                   |  |     |

**Supplemental Table 8.** Motifs found upstream of gene family 5, DEAD/DEAH Box Helicase family.

| Bp extracted around gene family 5 transcription initiation sites |    |                                                                                     |     |
|------------------------------------------------------------------|----|-------------------------------------------------------------------------------------|-----|
| Motif Number                                                     | 25 | 50                                                                                  | 100 |
| 1                                                                |    | 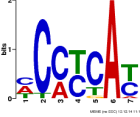 |     |

**Supplemental Table 9.** Motifs found upstream of gene family 6, *T. parva* Host Nucleus (TpHN) family.

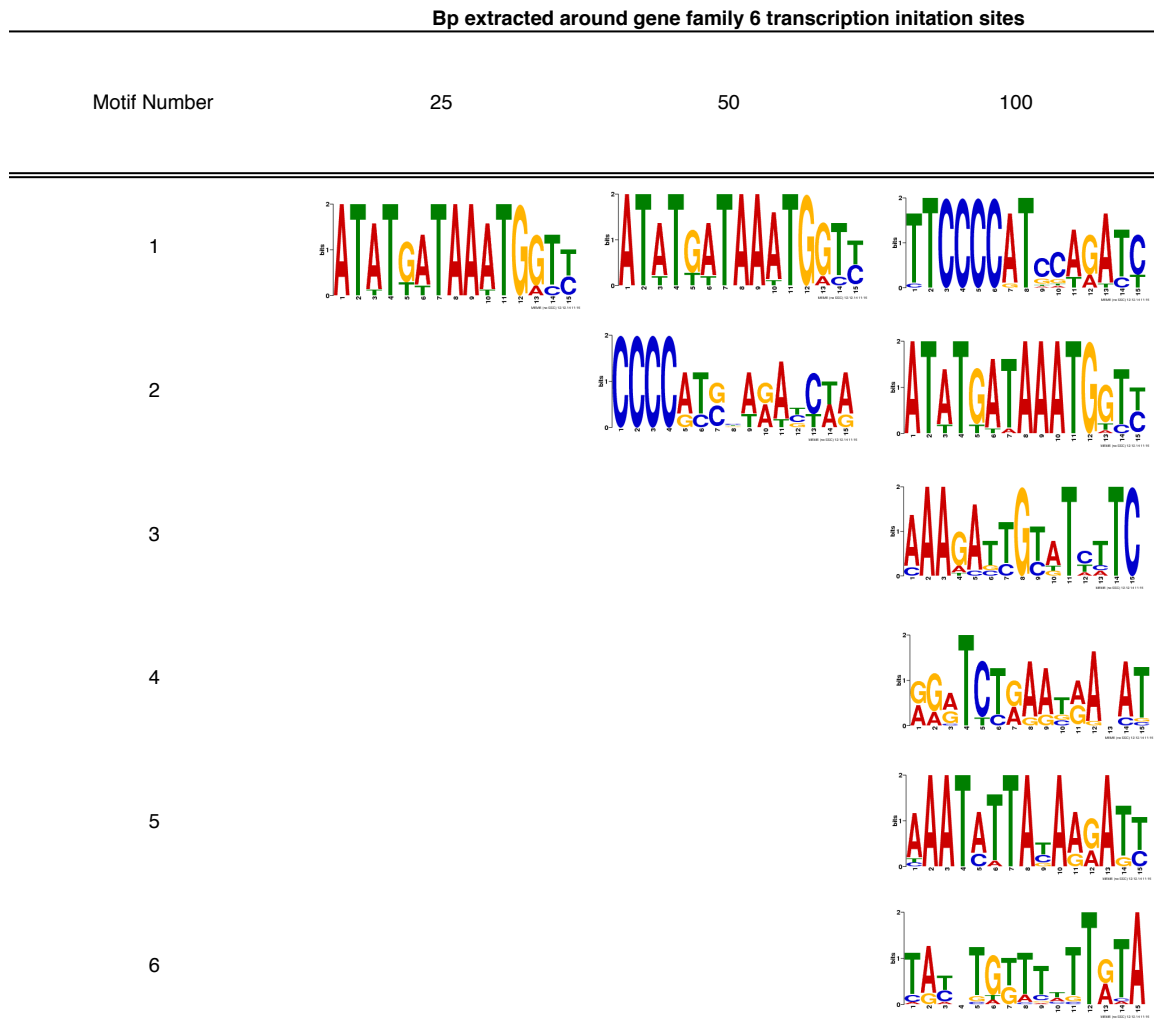

**Supplemental Table 10.** Motifs found upstream of gene family 7, DnaJ Chaperone family.

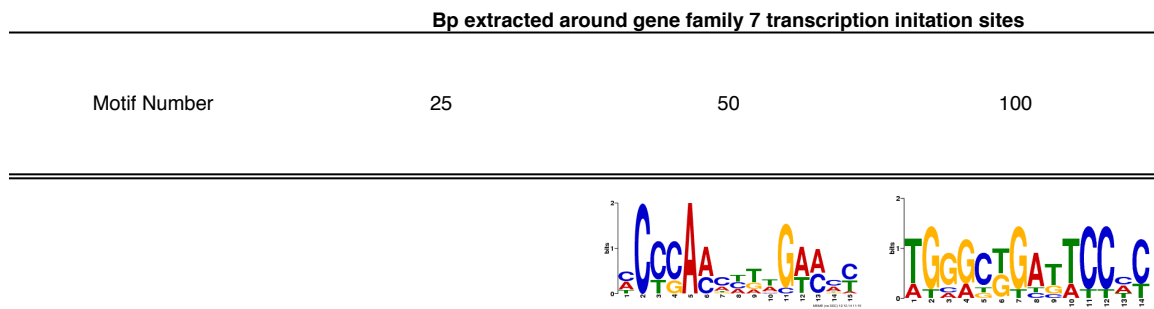

**Supplemental Table 11.** Motifs found upstream of gene family 8, ATPase family.

Bp extracted around gene family 8 transcription initiation sites

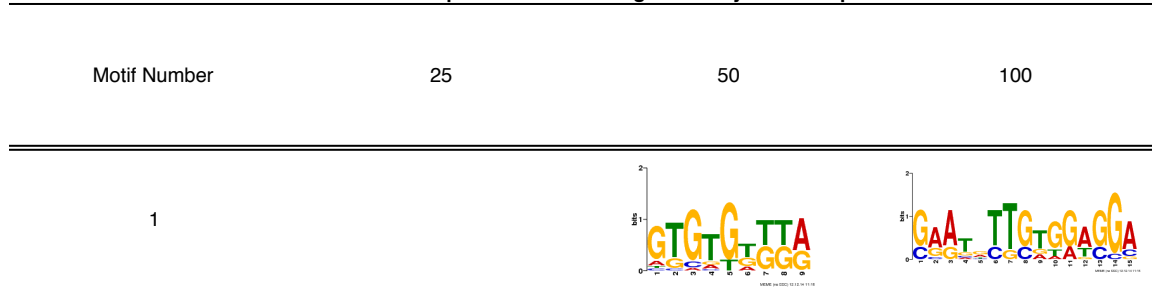

**Supplemental Table 12.** Motifs found upstream of gene family 9, Hypothetical Protein family.

Bp extracted around gene family 9 transcription initiation sites

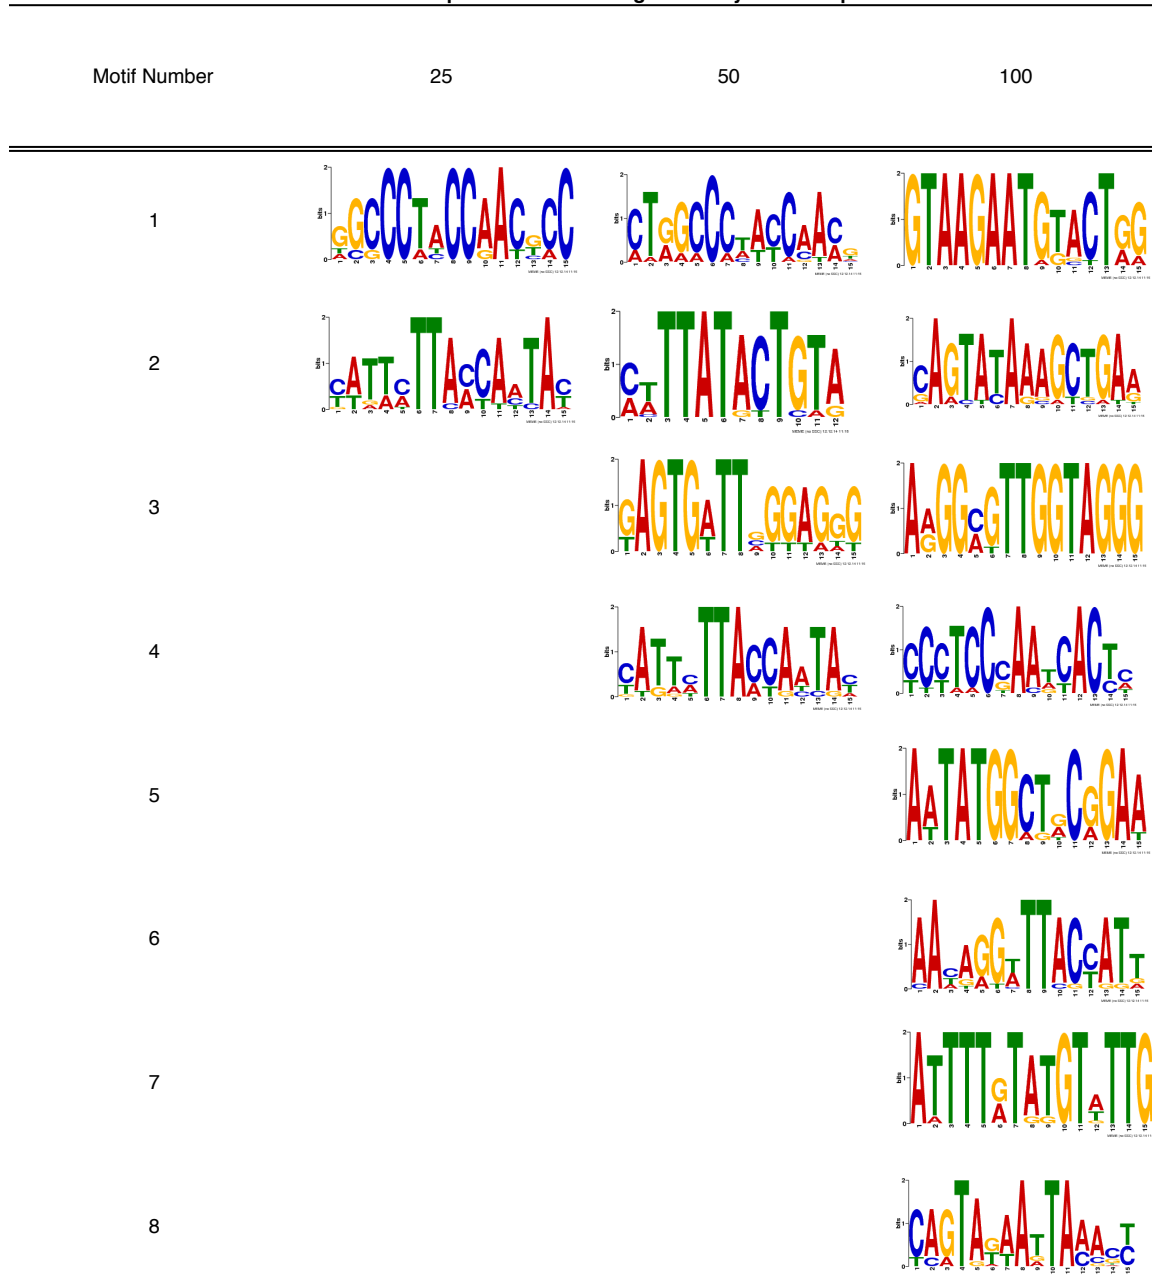

**Supplemental Table 13.** Motifs found upstream of gene family 10, ABC Transporter family.

Bp extracted around gene family 10 transcription initiation sites

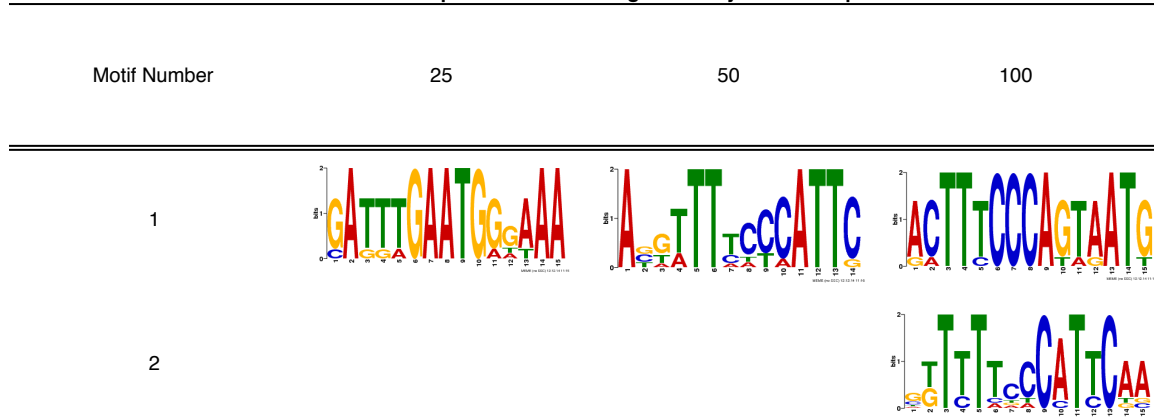

**Supplemental Table 14.** Motifs found upstream of gene family 11, Hypothetical Protein family.

Bp extracted around gene family 11 transcription initiation sites

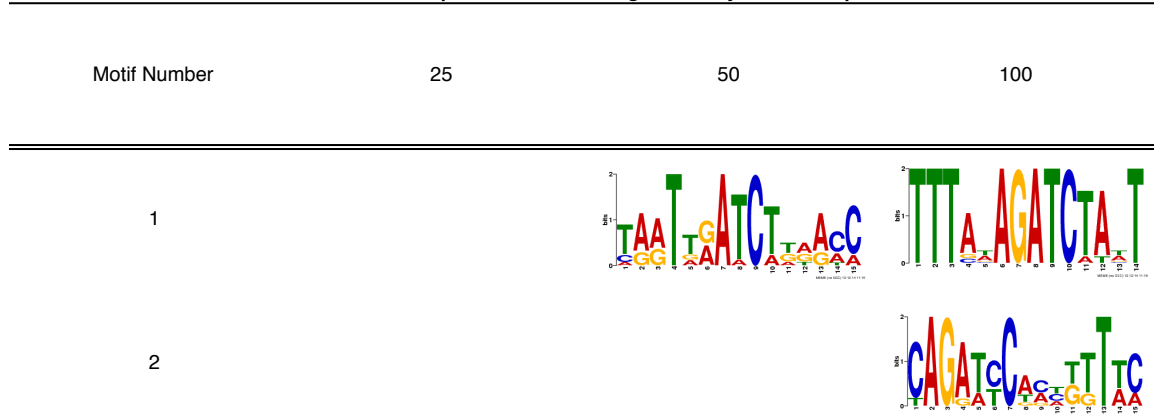

**Supplemental Table 15.** Motifs found upstream of gene family 12, Hypothetical Protein family.

Bp extracted around gene family 12 transcription initiation sites

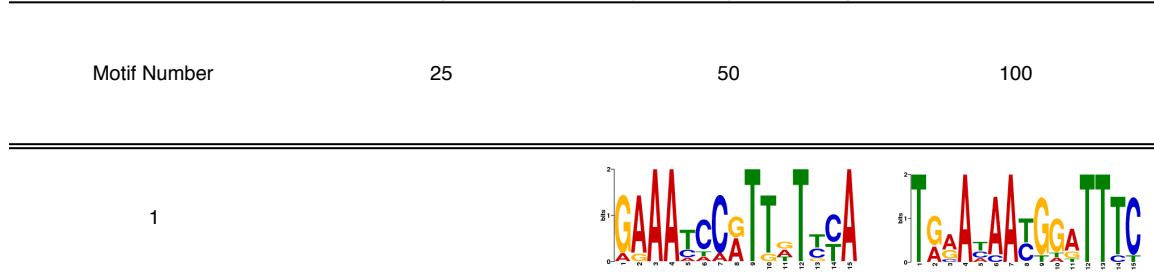



**Supplemental Table 16.** Motifs found upstream of gene family 13, Hypothetical DUF529 Protein family.

Bp extracted around gene family 13 transcription initiation sites

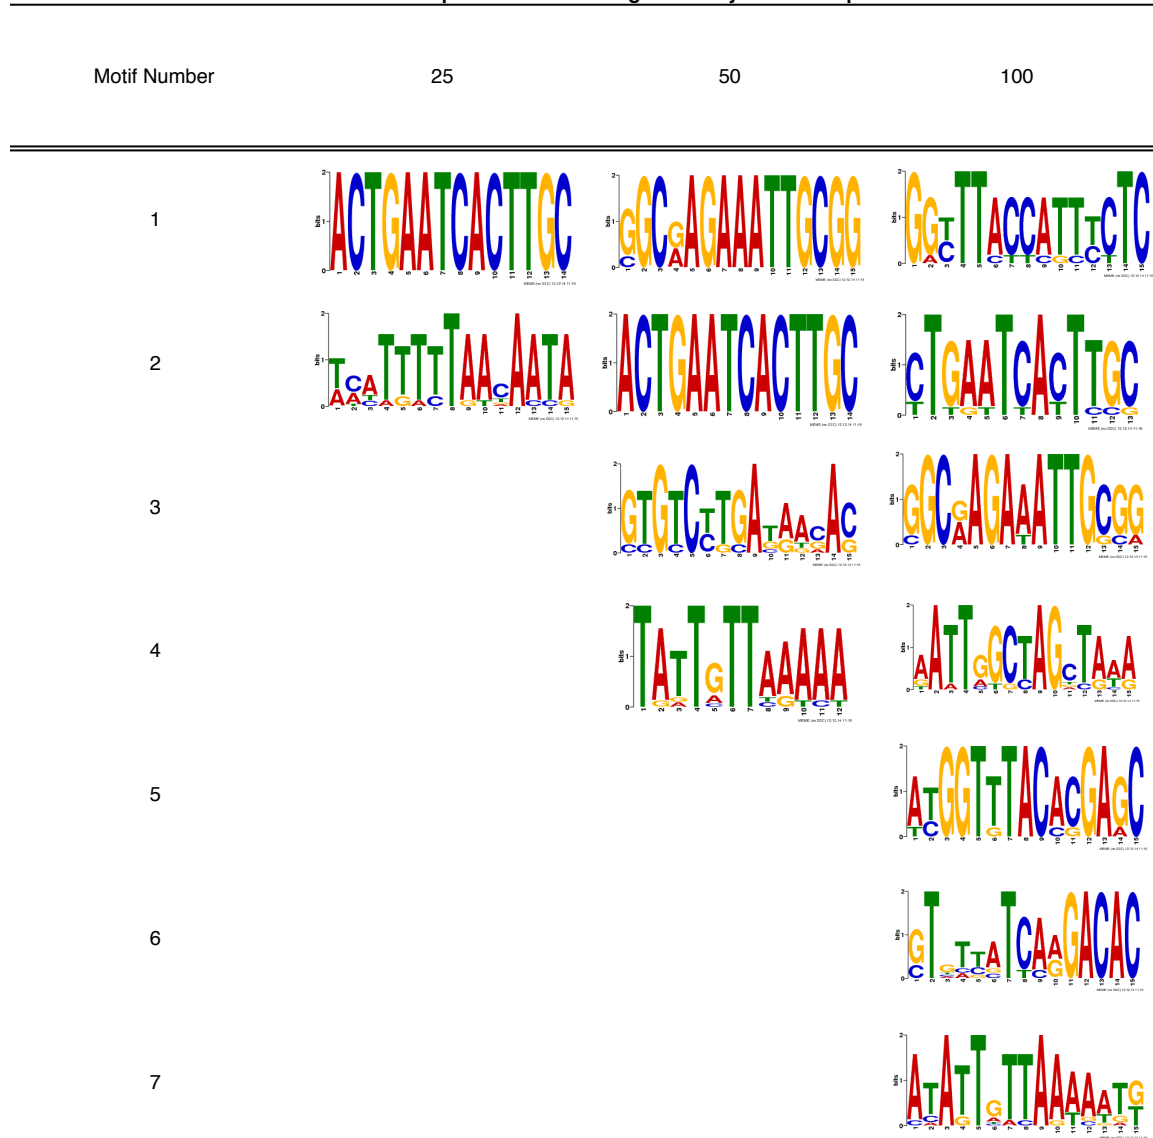

**Supplemental Table 17.** Motifs found upstream of gene family 14, Cyclophilin-type Peptidyl-prolyl *cis-trans* Isomerase family.

**Bp extracted around gene family 14 transcription initiation sites**

| Motif Number | 25 | 50 | 100 |
|--------------|----|----|-----|
|--------------|----|----|-----|

1

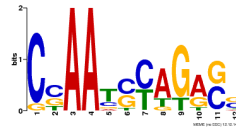

**Supplemental Table 18.** Motifs found upstream of gene family 15, Hypothetical Protein family.

**Bp extracted around gene family 15 transcription initiation sites**

| Motif Number | 25 | 50 | 100 |
|--------------|----|----|-----|
|--------------|----|----|-----|

1

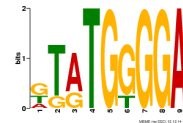

**Supplemental Table 19.** Motifs found upstream of gene family 20, Haloacid Dehalogenase-like Hydrolase Family.

**Bp extracted around gene family 20 transcription initiation sites**

| Motif Number | 25 | 50 | 100 |
|--------------|----|----|-----|
|--------------|----|----|-----|

1

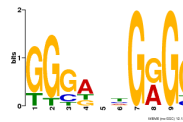

**Supplemental Table 20.** The distribution of motifs upstream of the Subtelomere-encoded Variable Secreted Protein Family (SVSP) and *T. parva* Host Nucleus (TpHN) gene families.

SVSP Gene Family

TpHN Gene Family

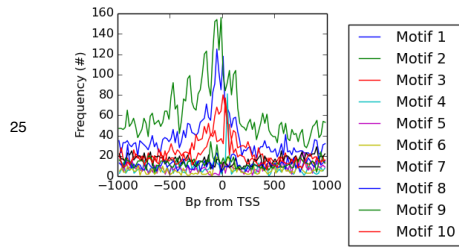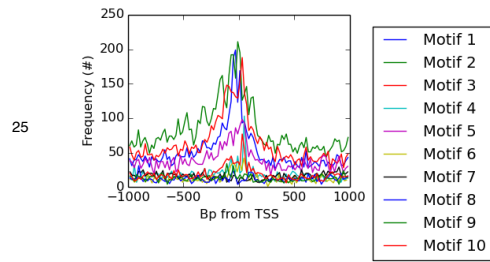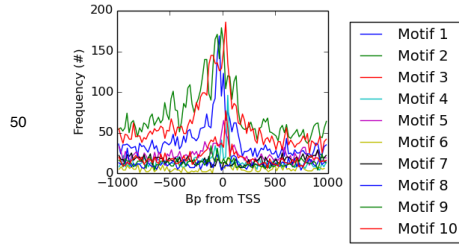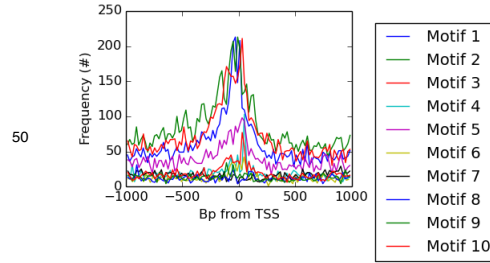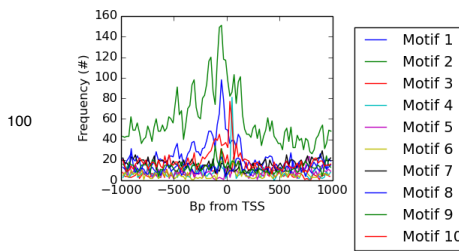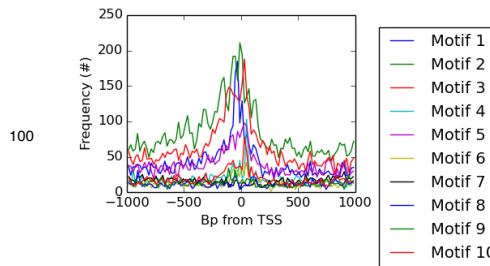



**Supplemental Table 22.** The genomic distribution of motifs found upstream of Subtelomere-encoded Variable Secreted Protein Family (SVSP) genes. The “search” column indicates the number of base pairs upstream and downstream of transcription initiation sites that were used for the motif search.

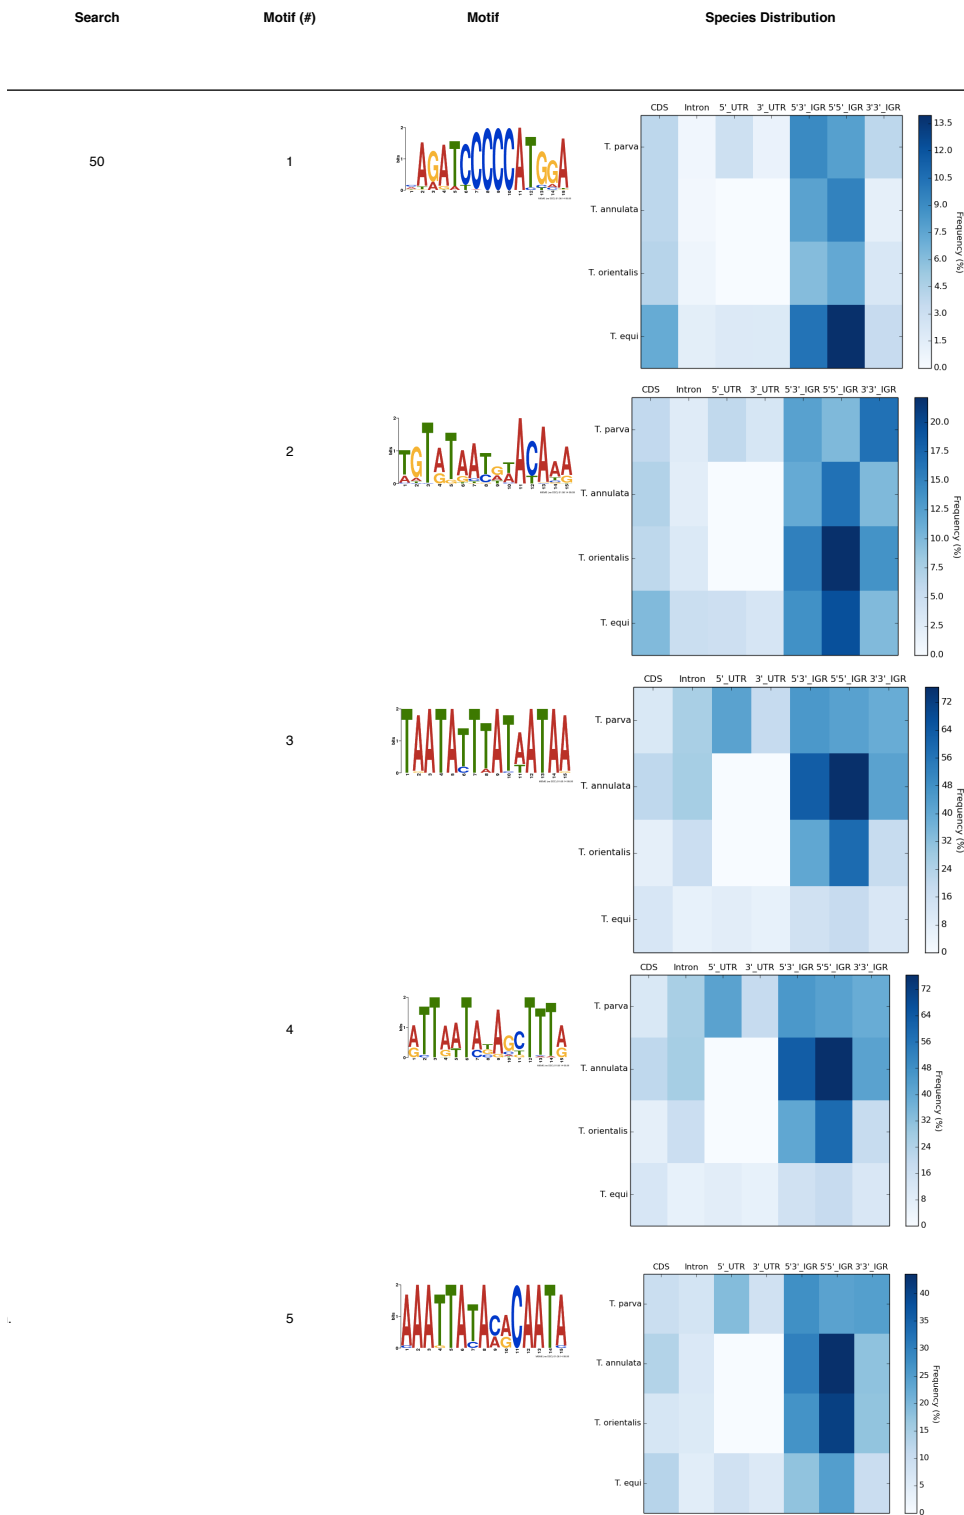

**Supplemental Table 22a.** The genomic distribution of motifs found upstream of Subtelomere-encoded Variable Secreted Protein Family (SVSP) genes. The “search” column indicates the number of base pairs upstream and downstream of transcription initiation sites that were used for the motif search.

SVSP Family genes

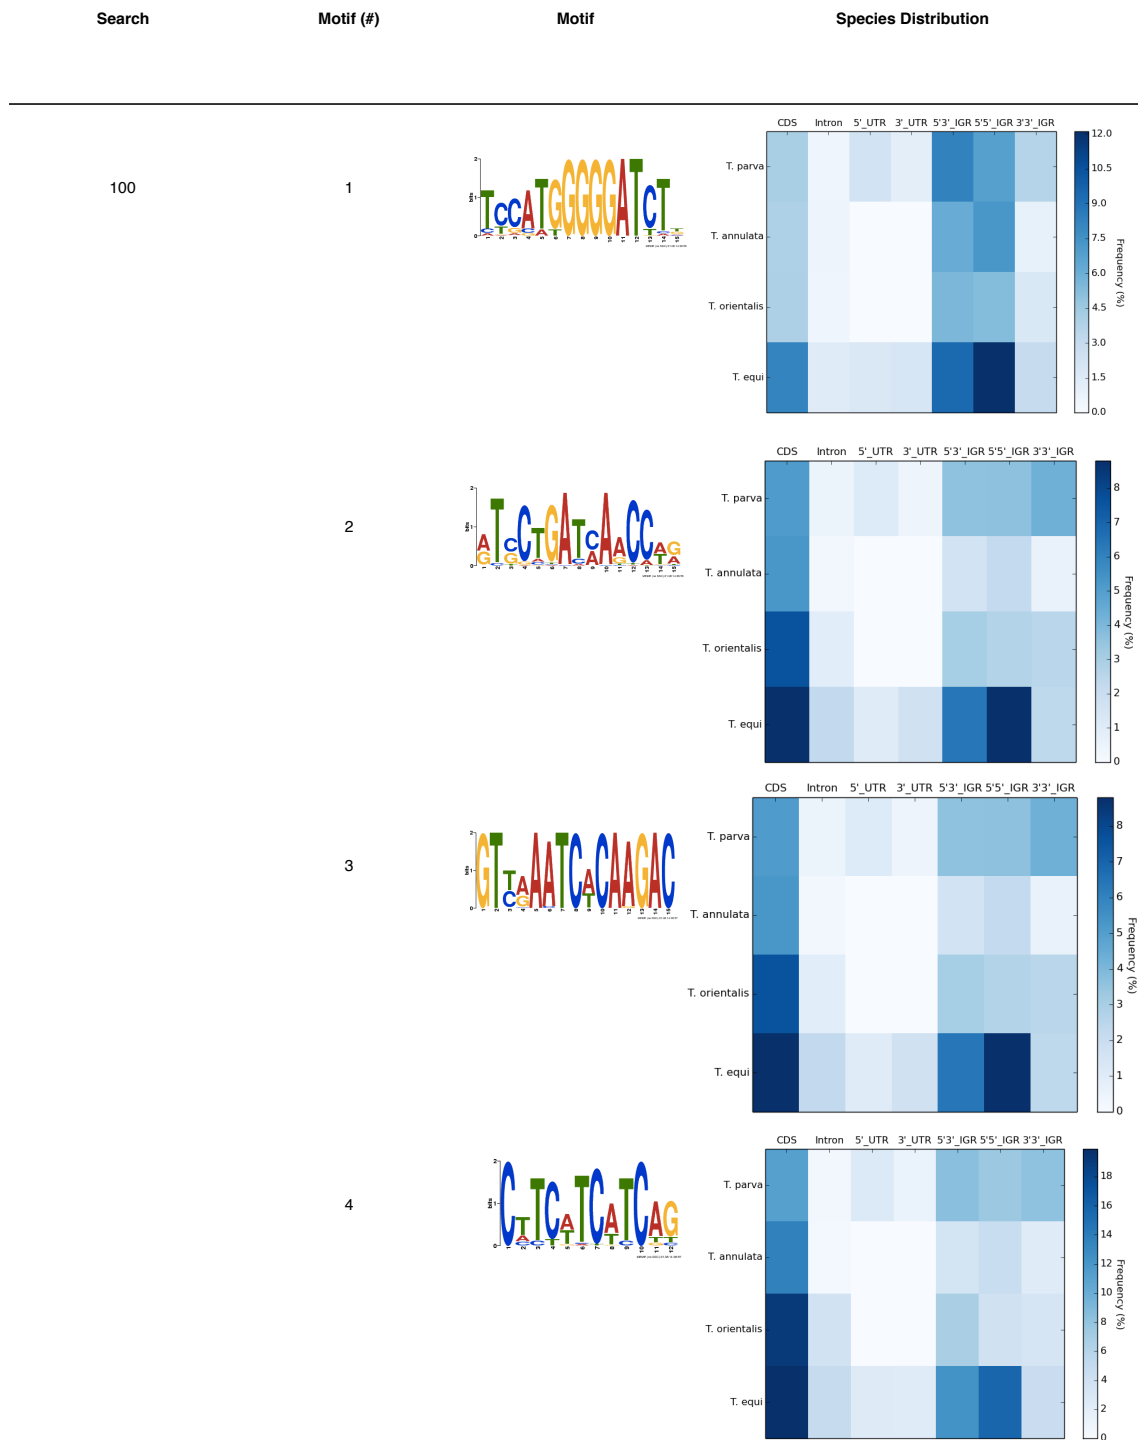

**Supplemental Table 22b.** The genomic distribution of motifs found upstream of Subtelomere-encoded Variable Secreted Protein Family (SVSP) genes. The “search” column indicates the number of base pairs upstream and downstream of transcription initiation sites that were used for the motif search.

SVSP Family genes

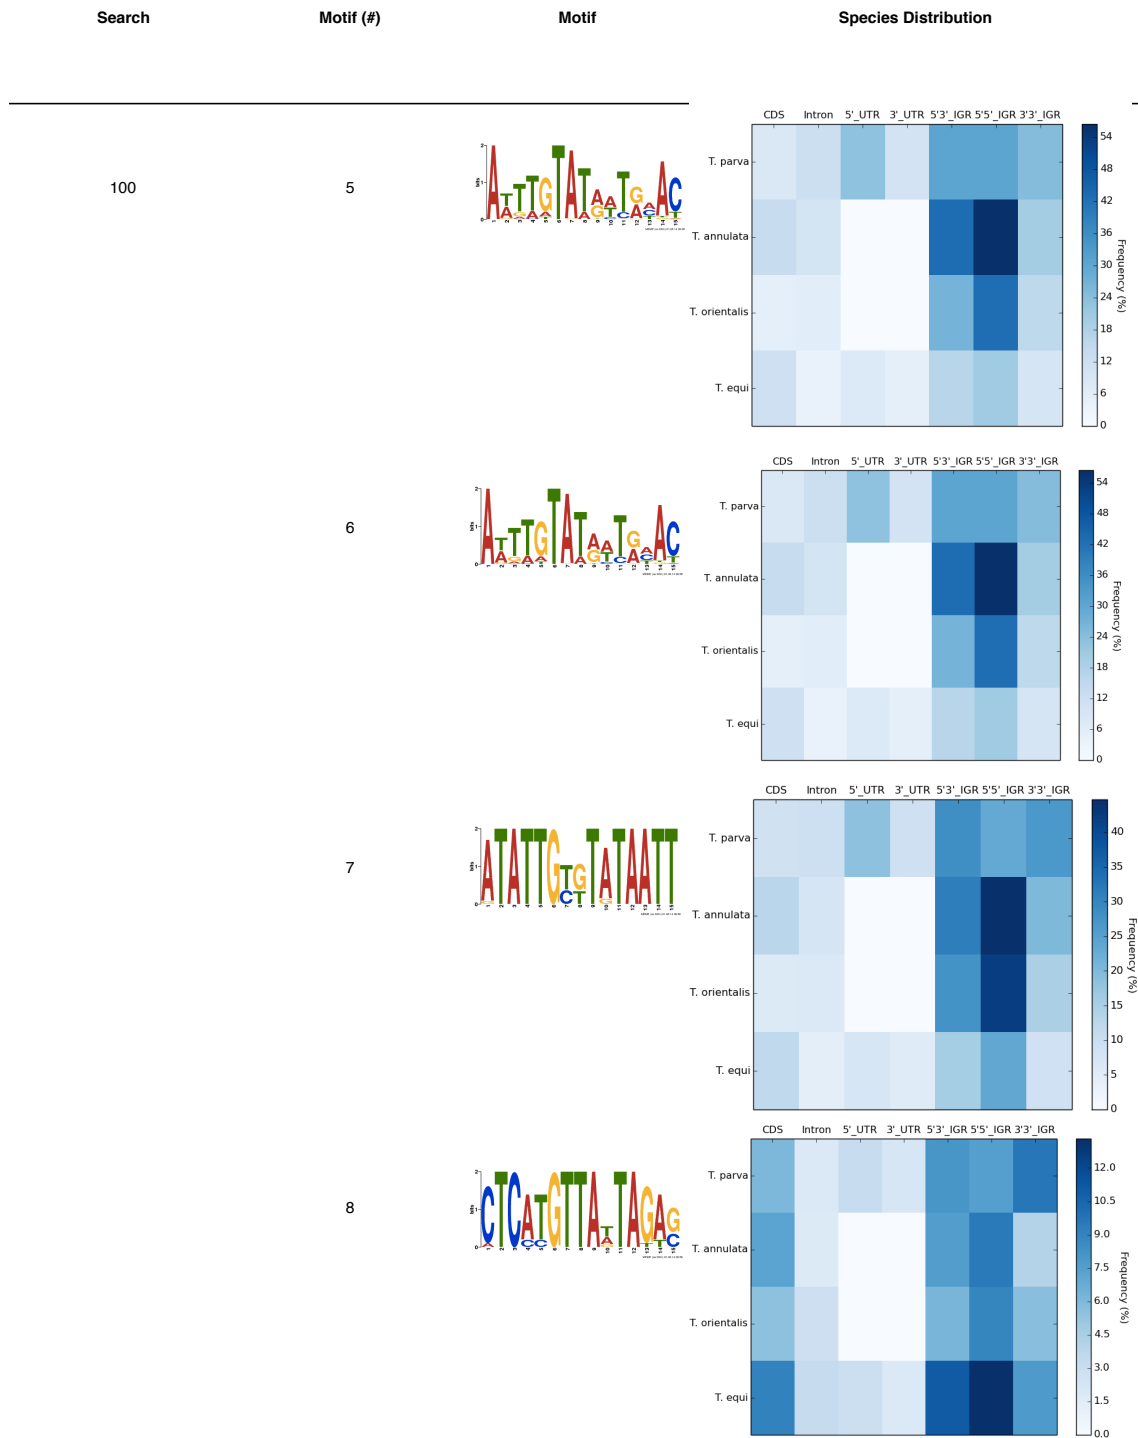

**Supplemental Table 22c.** The genomic distribution of motifs found upstream of Subtelomere-encoded Variable Secreted Protein Family (SVSP) genes. The “search” column indicates the number of base pairs upstream and downstream of transcription initiation sites that were used for the motif search.

SVSP Family genes

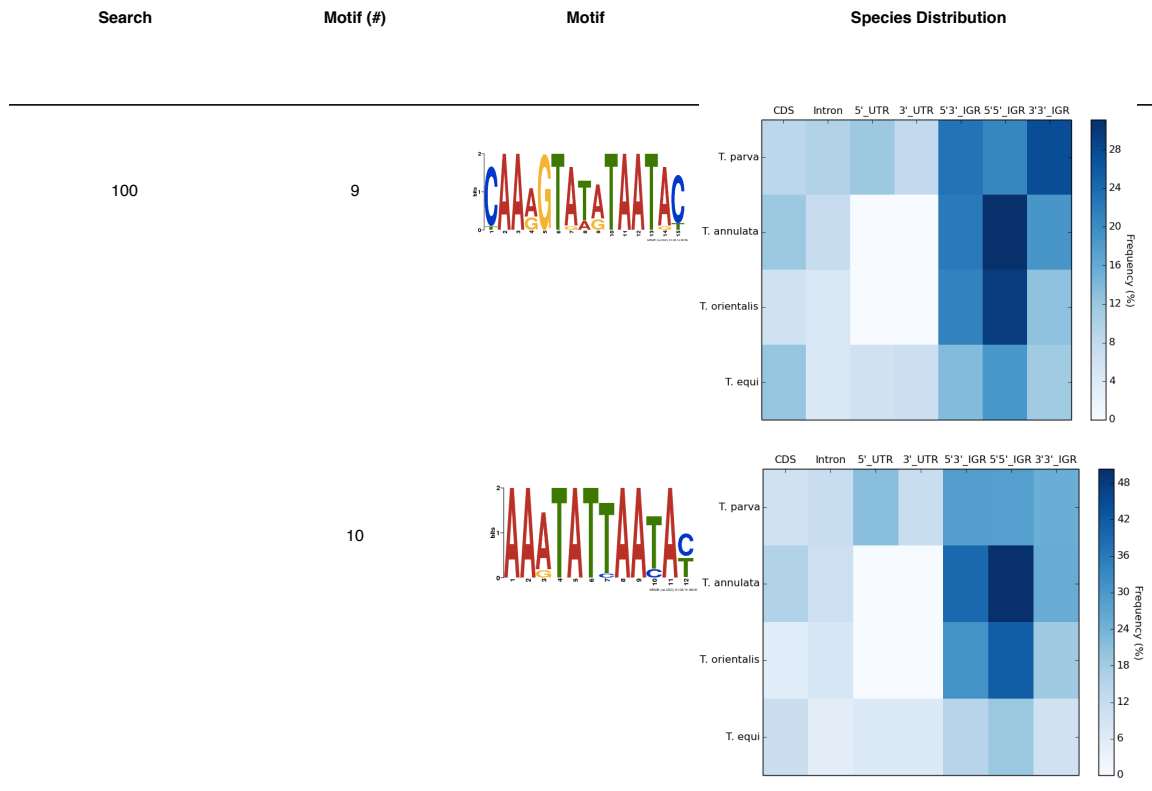



**Supplemental Table 23.** The genomic distribution of motifs found upstream of *T. parva* Host Nucleus (TpHN) genes. The “search” column indicates the number of base pairs upstream and downstream of transcription initiation sites that were used for the motif search.

TpHN Family genes

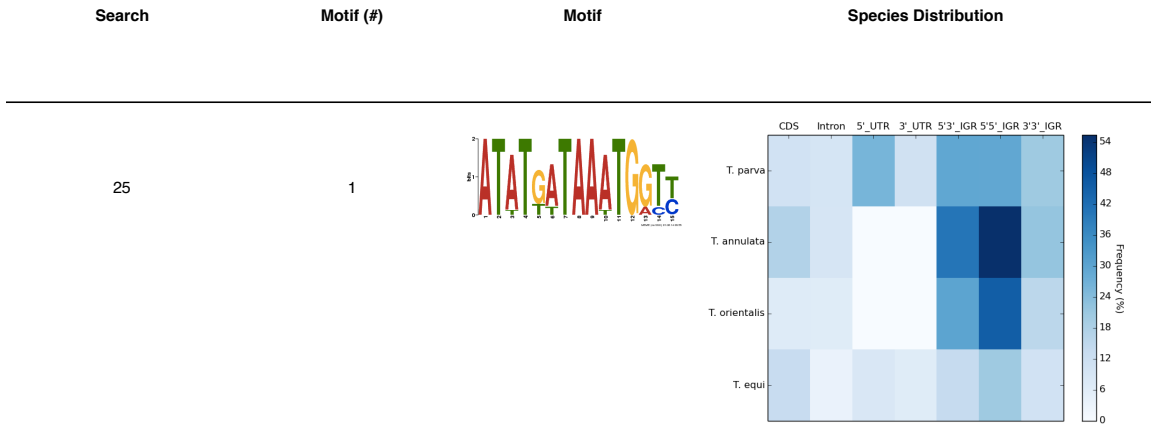

**Supplemental Table 24.** The genomic distribution of motifs found upstream of *T. parva* Host Nucleus (TpHN) genes. The “search” column indicates the number of base pairs upstream and downstream of transcription initiation sites that were used for the motif search.

TpHN Family genes

| Search | Motif (#) | Motif | Species Distribution |
|--------|-----------|-------|----------------------|
| 50     | 1         |       |                      |
|        | 2         |       |                      |
|        | 3         |       |                      |

**Supplemental Table 25a.** The genomic distribution of motifs found upstream of *T. parva* Host Nucleus (TpHN) genes. The “search” column indicates the number of base pairs upstream and downstream of transcription initiation sites that were used for the motif search.

TpHN Family genes

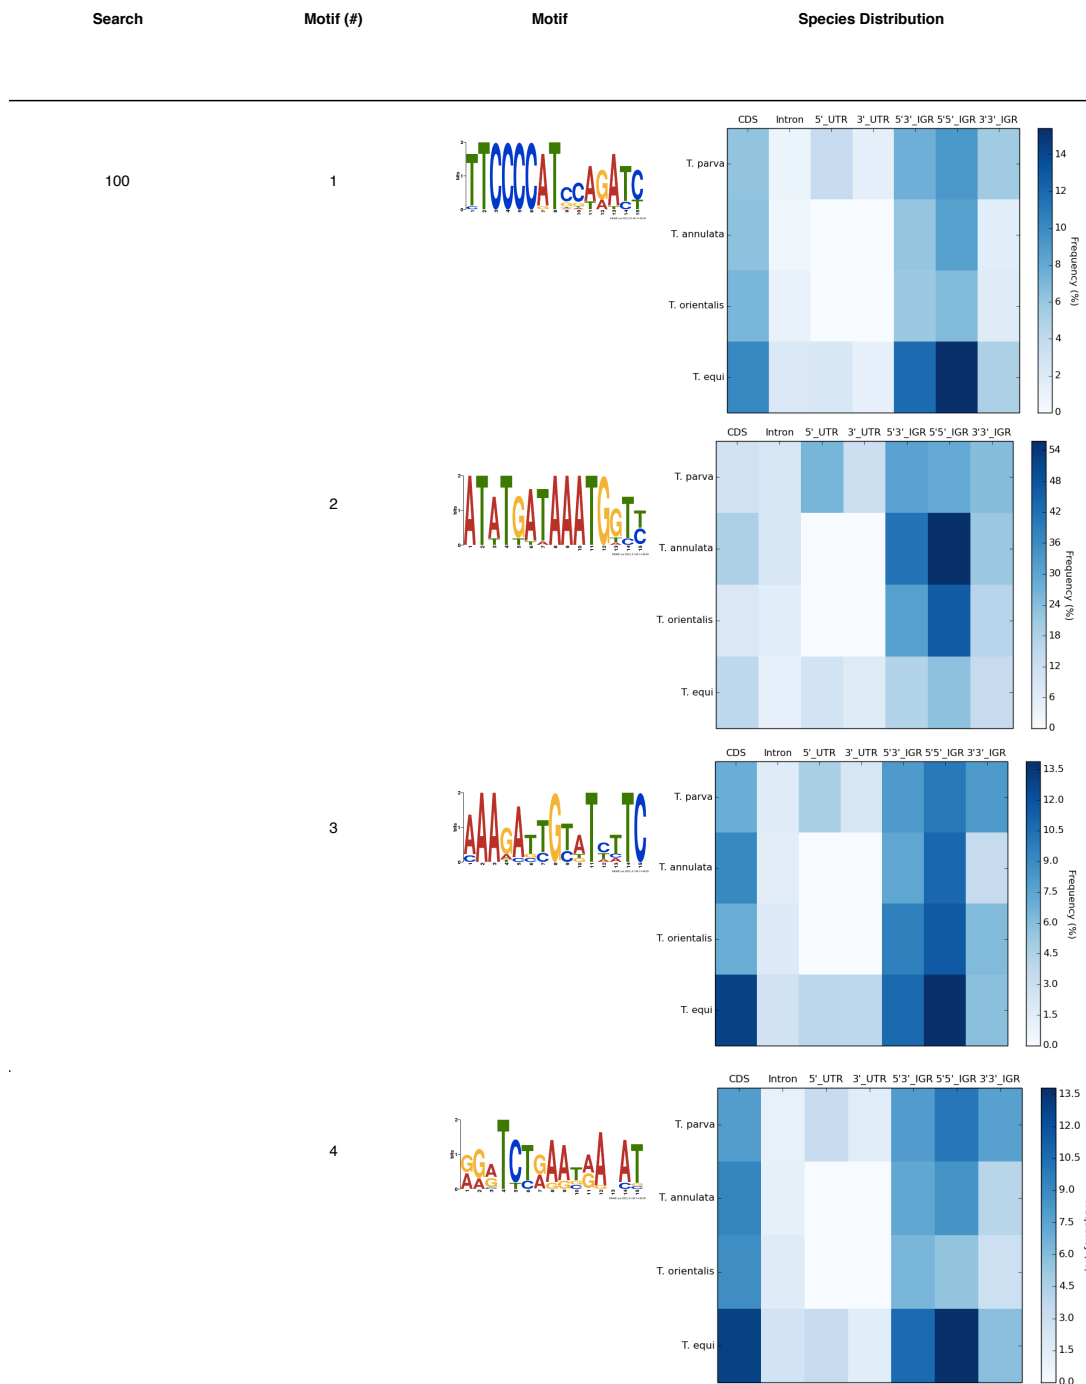

**Supplemental Table 25b.** The genomic distribution of motifs found upstream of *T. parva* Host Nucleus (TpHN) genes. The “search” column indicates the number of base pairs upstream and downstream of transcription initiation sites that were used for the motif search.

TpHN Family genes

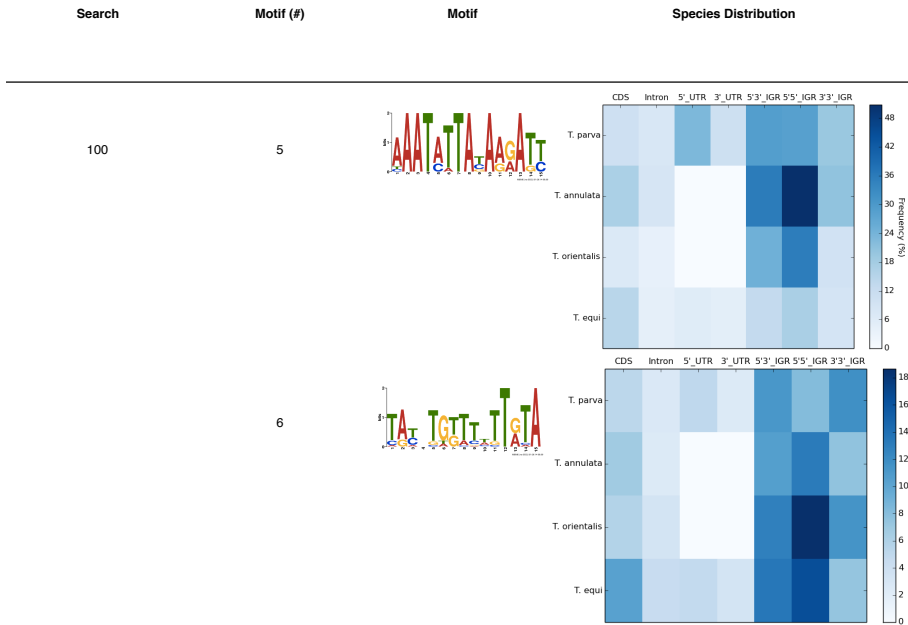

**Supplemental Table 26.** The conservation of gene networks downstream of the three highest-conserved motifs. Note that each table is not symmetrical across the diagonal because each species has different numbers of motifs, as well as number of orthologs for some genes.

**Spe2** Percent with high-confidence orthologs and upstream motif

| Species   | <i>Bb</i> | <i>Te</i> | <i>Ta</i> | <i>To</i> | <i>Tp</i> | Total |
|-----------|-----------|-----------|-----------|-----------|-----------|-------|
| <i>Tp</i> | 17.5      | 13.3      | 37.31     | 30.39     | 100       | 737   |
| <i>To</i> | 17.85     | 12.01     | 14.89     | 100       | 18.95     | 1182  |
| <i>Ta</i> | 22.07     | 11.6      | 100       | 24.89     | 38.9      | 707   |
| <i>Te</i> | 17.38     | 100       | 12.5      | 21.65     | 14.94     | 656   |
| <i>Bb</i> | 100       | 12.6      | 17.24     | 23.31     | 14.25     | 905   |

**G-box** Percent with high-confidence orthologs and upstream motif

| Species   | <i>Ta</i> | <i>To</i> | <i>Tp</i> | Total |
|-----------|-----------|-----------|-----------|-------|
| <i>Tp</i> | 47.06     | 26.93     | 100       | 323   |
| <i>To</i> | 22.94     | 100       | 26.61     | 327   |
| <i>Ta</i> | 100       | 20.95     | 42.46     | 358   |

**NFkB-like** Percent with high-confidence orthologs and upstream motif

| Species   | <i>Bb</i> | <i>Ta</i> | <i>To</i> | <i>Tp</i> | Total |
|-----------|-----------|-----------|-----------|-----------|-------|
| <i>Tp</i> | 2.21      | 34.56     | 16.18     | 100       | 136   |
| <i>To</i> | 2.16      | 10.39     | 100       | 9.53      | 231   |
| <i>Ta</i> | 1.74      | 100       | 10.43     | 20.43     | 230   |
| <i>Bb</i> | 100       | 6.06      | 7.58      | 4.55      | 66    |
